# Supplementary material
Source: Preprints.org preprint supplement (doi:10.20944/preprints201907.0008.v1)
Supplement: Supplementary file 1 [file supplementary]

*R1.1 Expand Intro*

It’s not clear what material the reviewer thought should be added to the Introduction. It has been rewritten to include background material on the NOAA CoastWatch Program.

*R1.2 Expand Abstract*

The Introduction has been rewritten to provide more information, specifically the ERDDAP data distribution server is now mentioned, as well as the EDC and the rerddapXtracto package for R which has been specifically developed for this course.

*R1.3 Include actions and statistics from other countries*

We now mention that EUMETSAT started a similar training program in 2017. To the best of our knowledge there are no other studies citing statistics about training efficacy for courses like this.

*R1.4 Clarify numbers given at the end of the summary*

These numbers are referring to the results for the survey sent to all participants from 2006-2019 that are shown in Figure 6. The text has been modified to clarify this point.

*R1.5 Any vision for future actions?*

A section of suggestions of way to improve the course and the evaluation process has been added to the Summary section.

*R2.1 Include more examples*

A case study has been added that details a number of operational outcomes achieved from one participant from the course

*R3.1 Discuss current theories of learning design*

The original manuscript did not emphasize the student projects which are a core part of the course. The student projects are now discussed and its mentioned how the inclusion of the student projects brings in some of the core tenets of Problem Based Learning (PBL).

*R3.2 Provide analysis of how indicators could be developed to better measure efficacy*

Some text has been added to the Summary section about ways to imprive the evaluation form questions.

*R3.4. Provide training scripts in an open repository.*

The R scripts which demonstrate how to use the rErddapXtracto package have now been written up into an online tutorial at <https://coastwatch.pfeg.noaa.gov/projects/r/>. This url has been added to the paper, along with reference to an additional online tutorial that demonstrates the use of ERDDAP: <https://coastwatch.pfeg.noaa.gov/projects/erddap>. These tutorial are both on github, and these references are now given in the paper:

R - <https://github.com/dhr-sc/text_book>
ERDDAP - <https://github.com/dhr-sc/erddap_basics>
